# Supplementary material for: New host and distribution records for five species of Enterogyrus (Dactylogyridae: Ancyrocephalinae) from cichlid hosts in South Africa
Source: Research Square preprint supplement (doi:10.21203/rs.3.rs-1513534/v1), 2022-04-07
Supplement: Supplementary file 1 [file 486405e33ef21f7ad8a604f2.xlsx]

## Sheet: Sheet1
New host and distribution records for five species of Enterogyrus (Dactylogyridae: Ancyrocephalinae) from cichlid hosts in South Africa
Iva Přikrylová1,2, Sareh Tavakol1, Nico J. Smit2 , Willem J. Smit1 and Wilmien J. Luus-Powell1
1 DSI-NRF SARChI Chair (Ecosystem Health), Department of Biodiversity, School of Molecular and Life Sciences, University of Limpopo, Sovenga, South Africa
2 Water Research Group, Unit for Environmental Sciences and Development, North-West University, Potchefstroom, South Africa
ivaprik@gmail.com
Morpholocigal measurements (in μm) of Enterogyrus spp. collected in the present study compared with previous finidings
Species	E. cichlidarum	E. cichlidarum	E. coronatus	E. coronatus	E. malmbergi	E. malmbergi	E. mashegoi	E. mashegoi	E. multispiralis	E. multispiralis
Host	T. sparrmanii	C. zillii	C. rendalli	T. guinensis	O. mossambicus	O. niloticus	O. mossambicus	O. mossambicus	T. sparrmanii	O. mossambicus
			T. sparrmanii		T. sparrmanii
Country	S. Africa	Israel	S. Africa	Ivory Coast	S. Africa	Cameroon	S. Africa	S. Africa	S. Africa	S. Africa
	present study	Paperna, 1963	present study	Parisell et al. 1991	present study	Bilong Bilong, 1988	present study	Luus-Powell et al. 2020	present study	Luus-Powell et al. 2020
	n = 1	–	n = 14	n = 25	n = 6	n = 20	n = 2	n = 25	n = 4	n = 30
Dorsal anchor
inner length	–		6.5–12.5	7–13	20–26.5	22–25	13.5–18.5	15–26.7	16–18.5	10–16.7
outer length	–	12–17	13–17	14–18	33.5–37.5	31–35	38.5–39	25–36.7	26–28	20–26.7
outer process length	–	17–20	15–20	18–23.5	23–28.5	21–26	39–41.5	22.5–41.7	21–24	20–26.7
inner process length	–	6–10	7.5–10.5	6–8	17–21	14–16	21.5–22	13–21.7	14.5–15	11.7–15
point length	–	–	3–6	4–8	5.5–7	5.5–7	7–7.5	2.5–5	6–7	3.3–5
Ventral anchor
inner length	–	–	12–15	13–16	18.5–20.5	16–19	17–17.5	12.5–18.4	15–16	13.4–17.5
outer length	–	11–13	11–13.5	11–16	15–16	12.5–16.5	14–14.5	13.4–17.5	13.5–14.5	11.7–15
outer process length	–	2–3	4–6.5	5–7.5	9–11	8–11	5–8.5	5.8–8.4	6.5–7.5	5.8–10
inner process length	–	5	5–6.5	3–7	9–10.5	7.5–10	6.5–9	6.8–8.7	6–7	5–10
point length	–	4–5	3–5	3–7	4.5–6	4–6	4.5–5.5	2.5–3.7	5–6	2.5–3.7
Ventral bar length	–	50	14–15.5	17–19	42–55	40–49	28–32	20–27.5	16.5	13.5–20
Hook length	–	15	12.5–15.5	12–16	13.5–16.5	12–16	15–17	12.5–17.5	14.5–16	15–16.7
Cirrus length	42	43	41.5–52	43–52	44–55	40–49	78.9–86.2	75–88.5	76–85	65.3–73.5
Spiral formula	1–2–3	1–2–3	4–2–3	4–2–1+2	3–2–2	3–2–2	5–2–3	5–2–3	8–2–4	8/9–2–4
number of studied specimens (n)
